# Supplementary material for: Empirical Formula to Calculate Ionic Strength of Limnetic and Oligohaline Water on the Basis of Electric Conductivity: Implications for Limnological Monitoring
Source: MDPI journal article supplement (doi:10.3390/w15203632), 2023-10-17
Supplement: s1 [file s1]

Supplementary figures to the manuscript:

# **Empirical Formula to Calculate Ionic Strength of Limnetic and Oligohaline Water on the Basis of Electric Conductivity: Implications for Limnological Monitoring**

**Michał Woszczyk <sup>1,\*</sup>, Alfred Stach <sup>2</sup>, Jakub Nowosad <sup>2</sup>, Izabela Zawiska <sup>3</sup>, Katarzyna Bigus <sup>4</sup>  
and Monika Rzodkiewicz <sup>1</sup>**

<sup>1</sup> Biogeochemistry Research Group, Adam Mickiewicz University, B. Krygowskiego 10, 61-680 Poznań, Poland

<sup>2</sup> Department of Geoinformation, Adam Mickiewicz University, B. Krygowskiego 10, 61-680 Poznań, Poland

<sup>3</sup> Past Landscapes Dynamics Laboratory, Institute of Geography and Spatial Organisation, Polish Academy of Sciences, Twarda 51/55, 00-818 Warsaw, Poland

<sup>4</sup> Department of Environmental Chemistry, Akademia Pomorska, Arciszewskiego 22a, 76-200 Słupsk, Poland

\* Correspondence: woszczyk@amu.edu.pl; Tel.: +48-61-829-6194

submitted to *Water*

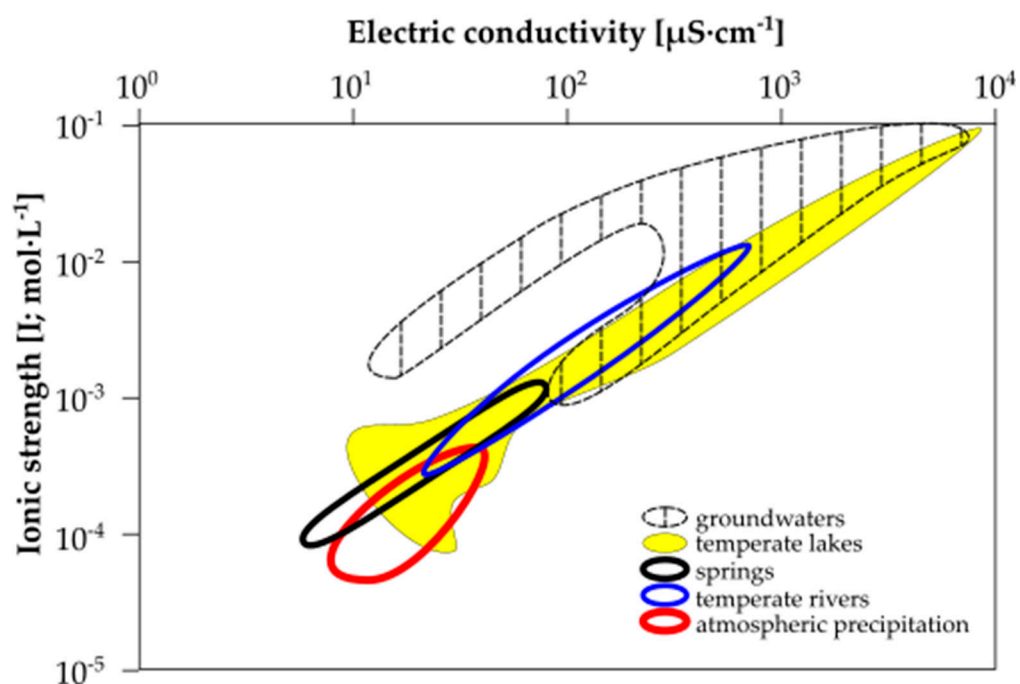

**Figure S1.** Electric conductivity (EC) vs ionic strength (I) in different types of fresh waters.

Note considerable variability in ground waters. The variability is determined by chemical composition of waters and makes it difficult to establish an universal empirical formula to derive I from EC. Ground water data from [53 - 56]. Lake water data from the databases of Leibniz Institute of Freshwater Ecology and Inland Fisheries (IGB Berlin, Germany) and Swiss Federal Institute of Aquatic Science and Technology (EAWAG, Kastanienbaum, Switzerland) as well as [57 - 58] and the authors' measurements. River water data from [59 - 62]. Spring water data from [61]. Rain water data from the Integrated Environmental Monitoring Base Station, Poland.

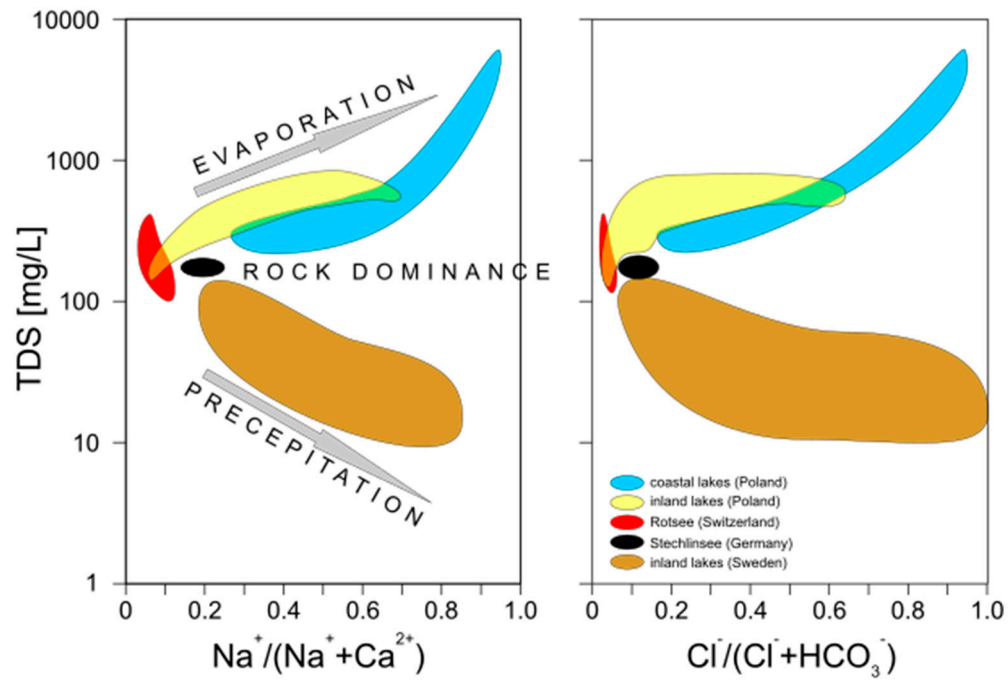

**Figure S2.** Chemical composition of water in the lakes of this study according to Gibbs.

Grey arrows indicate the increasing contribution from environmental factors (precipitation, evaporation and rock dominance) in controlling lake water chemistry. The lakes monitored represent all hydrochemical types of natural waters thus implying that the data used for model development are representative for all natural/seminatural temperate lakes.

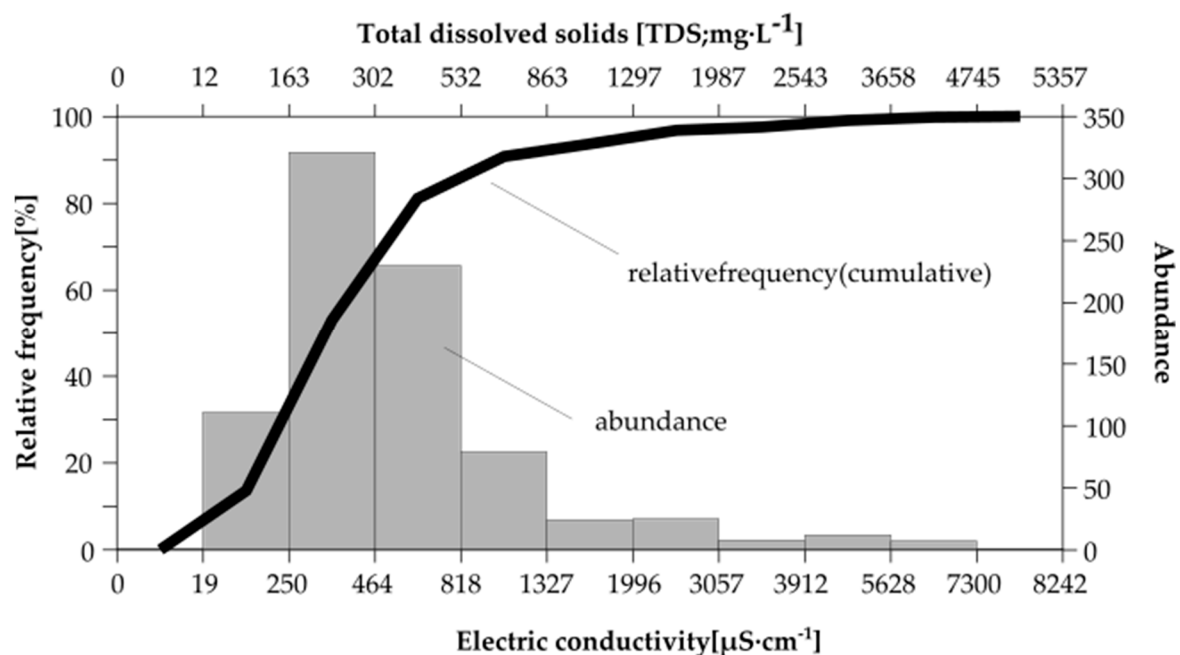

**Figure S3.** EC (and TDS) frequency distribution in a data base.

The distribution is highly positively skewed and records with EC between 250 and 818 were the most abundant. EC classes of the histogram were distinguished using Jenks optimization [63].

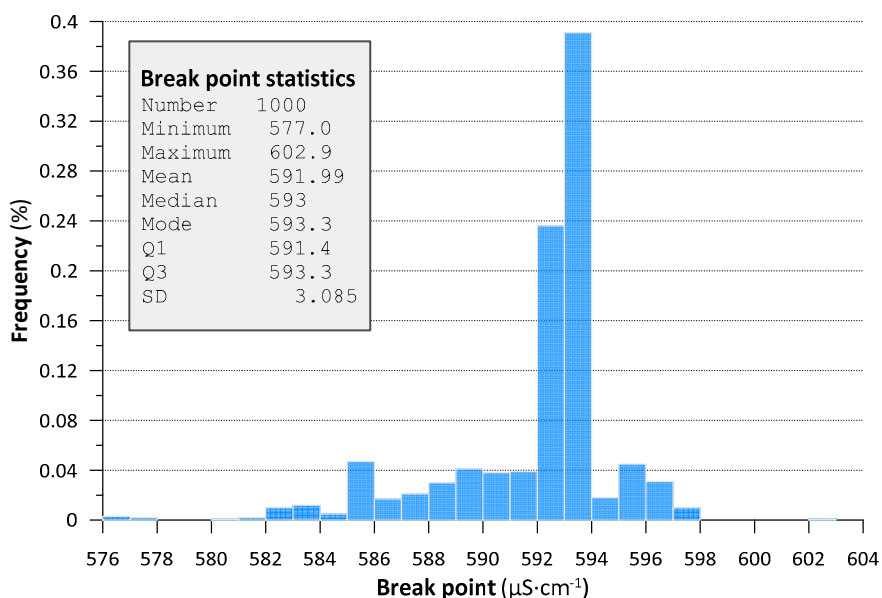

**Figure S4.** Histogram and descriptive statistics of the BP1 position in one breakpoint regression models obtained for 1000 random samples taken from original dataset.

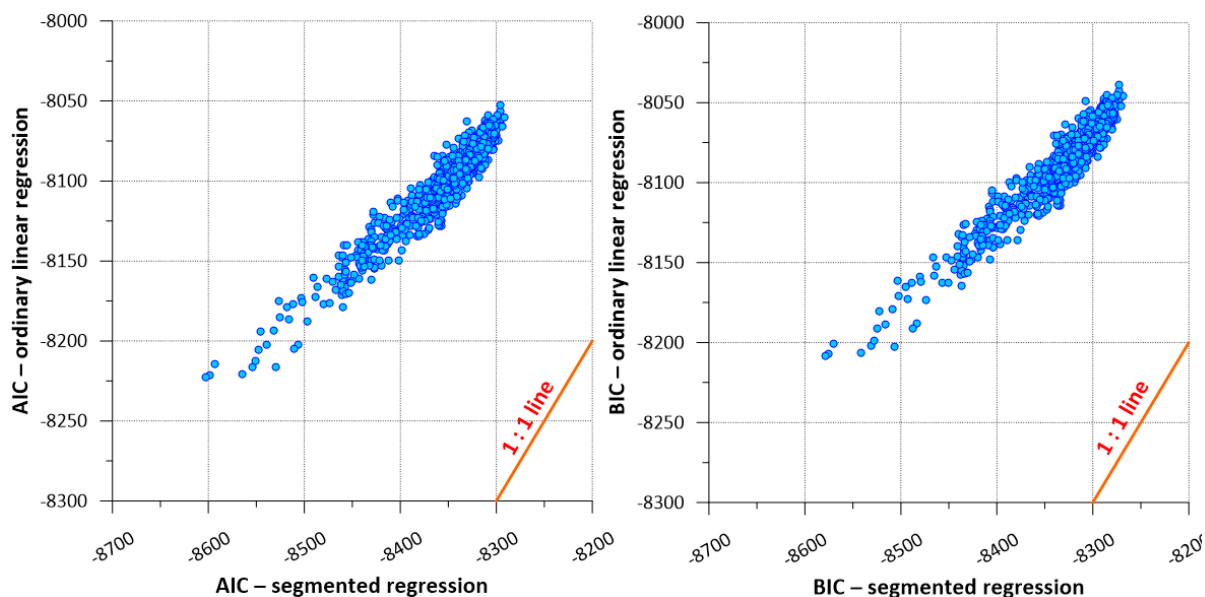

**Figure S5.** Relationship between the model fittings for segmented regression and ordinary linear regression in terms of Akaike information criterion (AIC; left panel) and Bayesian information criterion (BIC; right panel) calculated for 1000 random subsamples from EC vs I database.

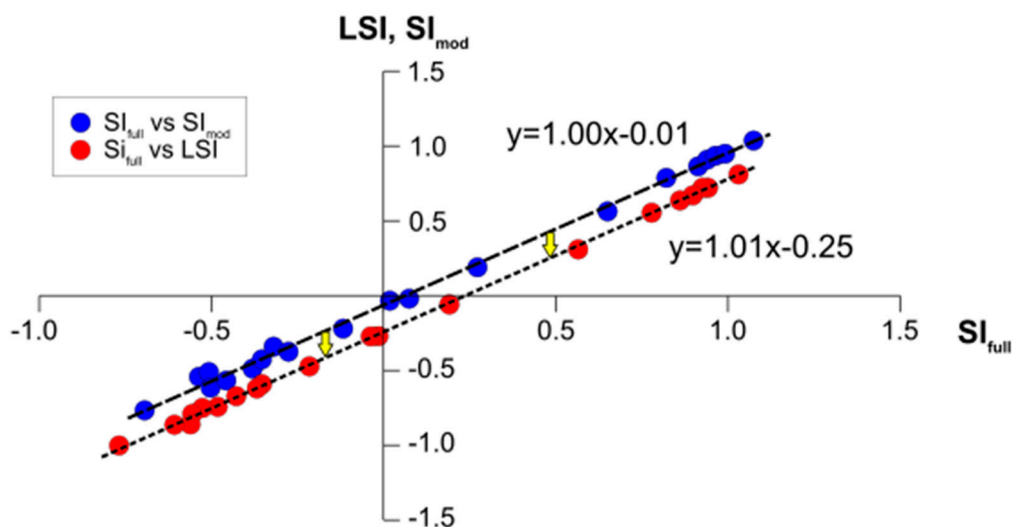

**Figure S6.** The application of the model developed for calculating saturation index for carbonates in lake waters.

The SI calculated using our modelled  $\gamma$  ion activity coefficients ( $SI_{\text{model}}$ ) and Langelier SI (LSI) computed with an online LSI calculator were compared to SI calculated on the basis of full ion composition of Lake Kierskie waters ( $SI_{\text{full}}$ ). Both methods reproduced  $SI_{\text{full}}$  with considerable accuracy, however,  $SI_{\text{model}}$  showed better agreement with the empirical data. There were systematic differences between  $SI_{\text{full}}$  and  $SI_{\text{model}}$  as well as LSI of c.a. -0.06 and c.a. -0.24, respectively.

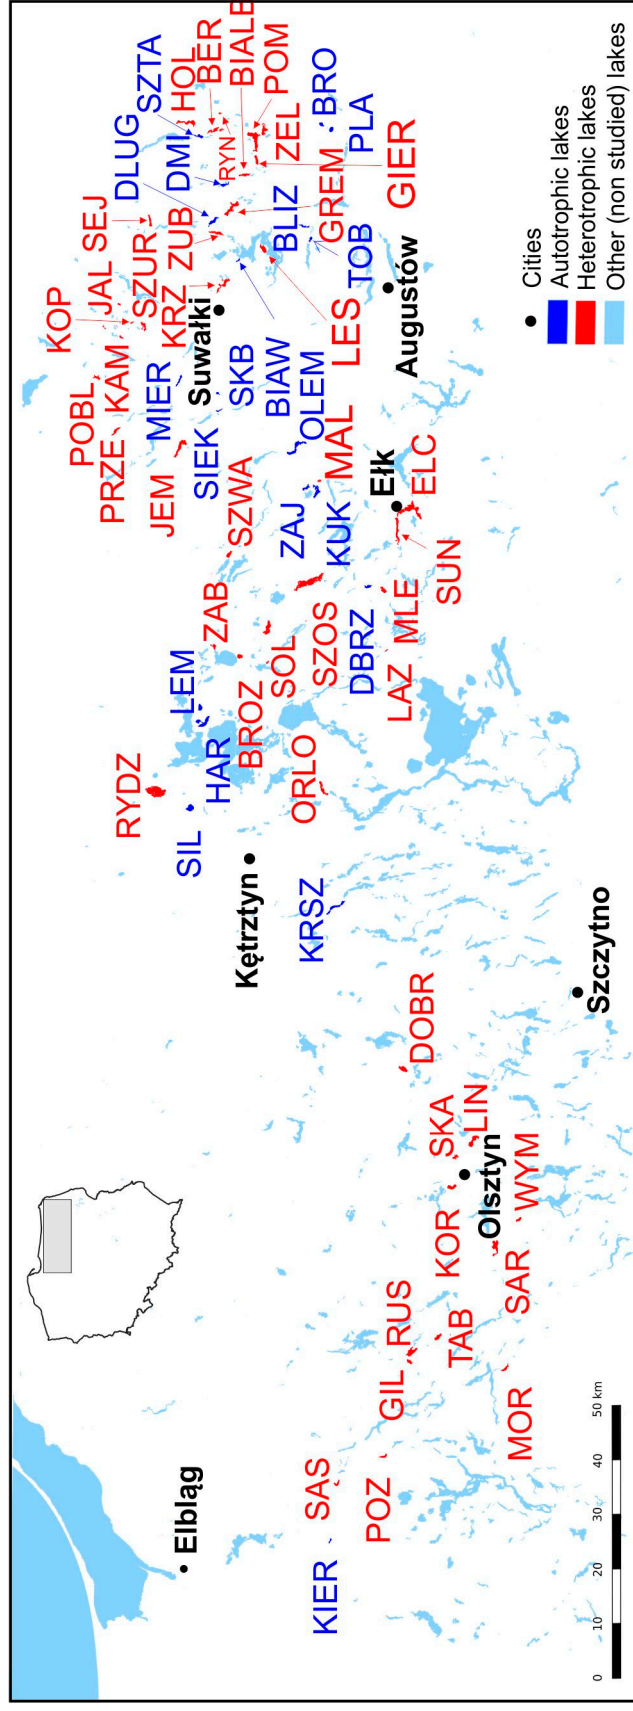

**Figure S7.** The results of screening of  $\Delta p\text{CO}_2$  (difference between  $p\text{CO}_2$  in lake surface waters and atmospheric  $\text{CO}_2$  concentration) for lakes of NE Poland.

Heterotrophic lakes showed positive  $\Delta p\text{CO}_2$  (emitted  $\text{CO}_2$  to the atmosphere) while autotrophic lakes had negative  $\Delta p\text{CO}_2$  values (absorbed  $\text{CO}_2$  from the atmosphere). The map of lakes taken from [64].

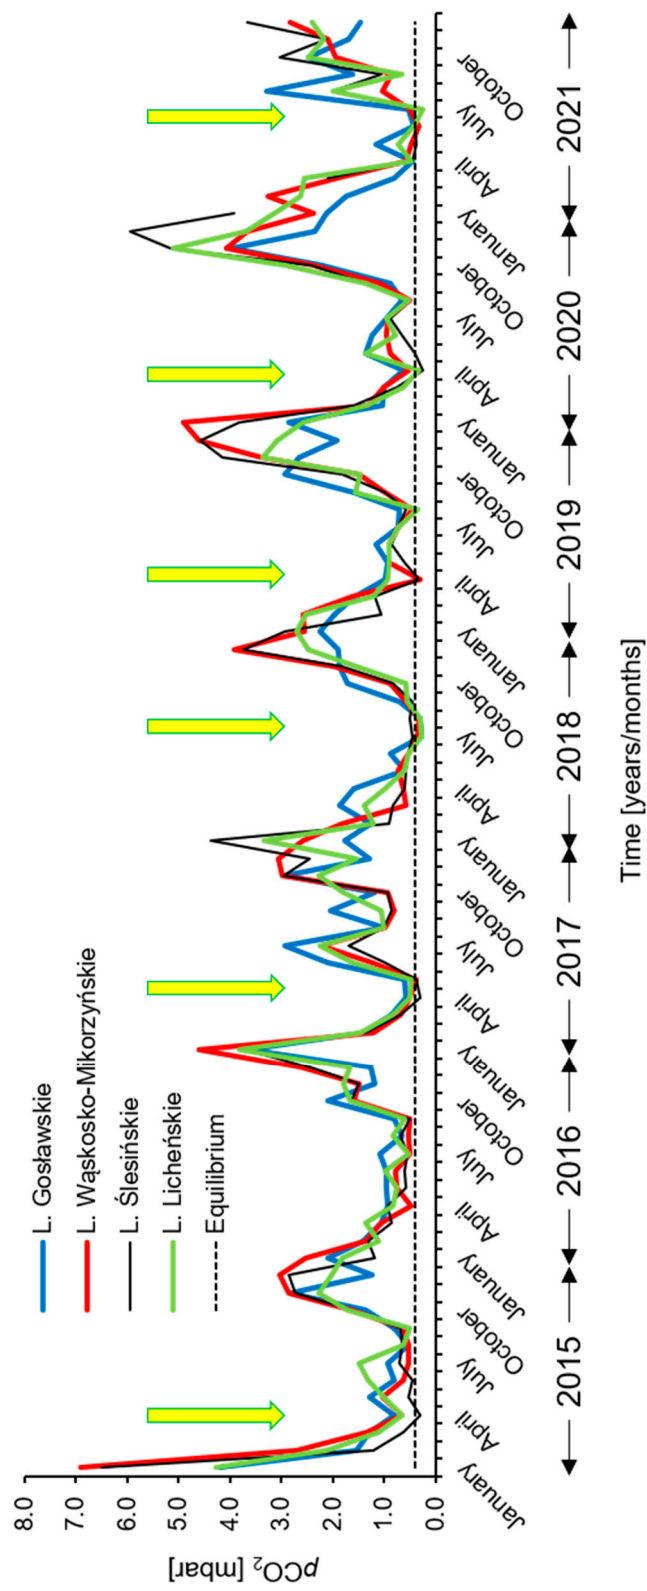

**Figure S8.** Temporal changes in  $p\text{CO}_2$  in the surface waters of the Konin lakes between January 2015 and December 2021. Yellow arrows indicate periods of autotrophy (i.e. when  $p\text{CO}_2 < \text{equilibrium } p\text{CO}_2$ ).

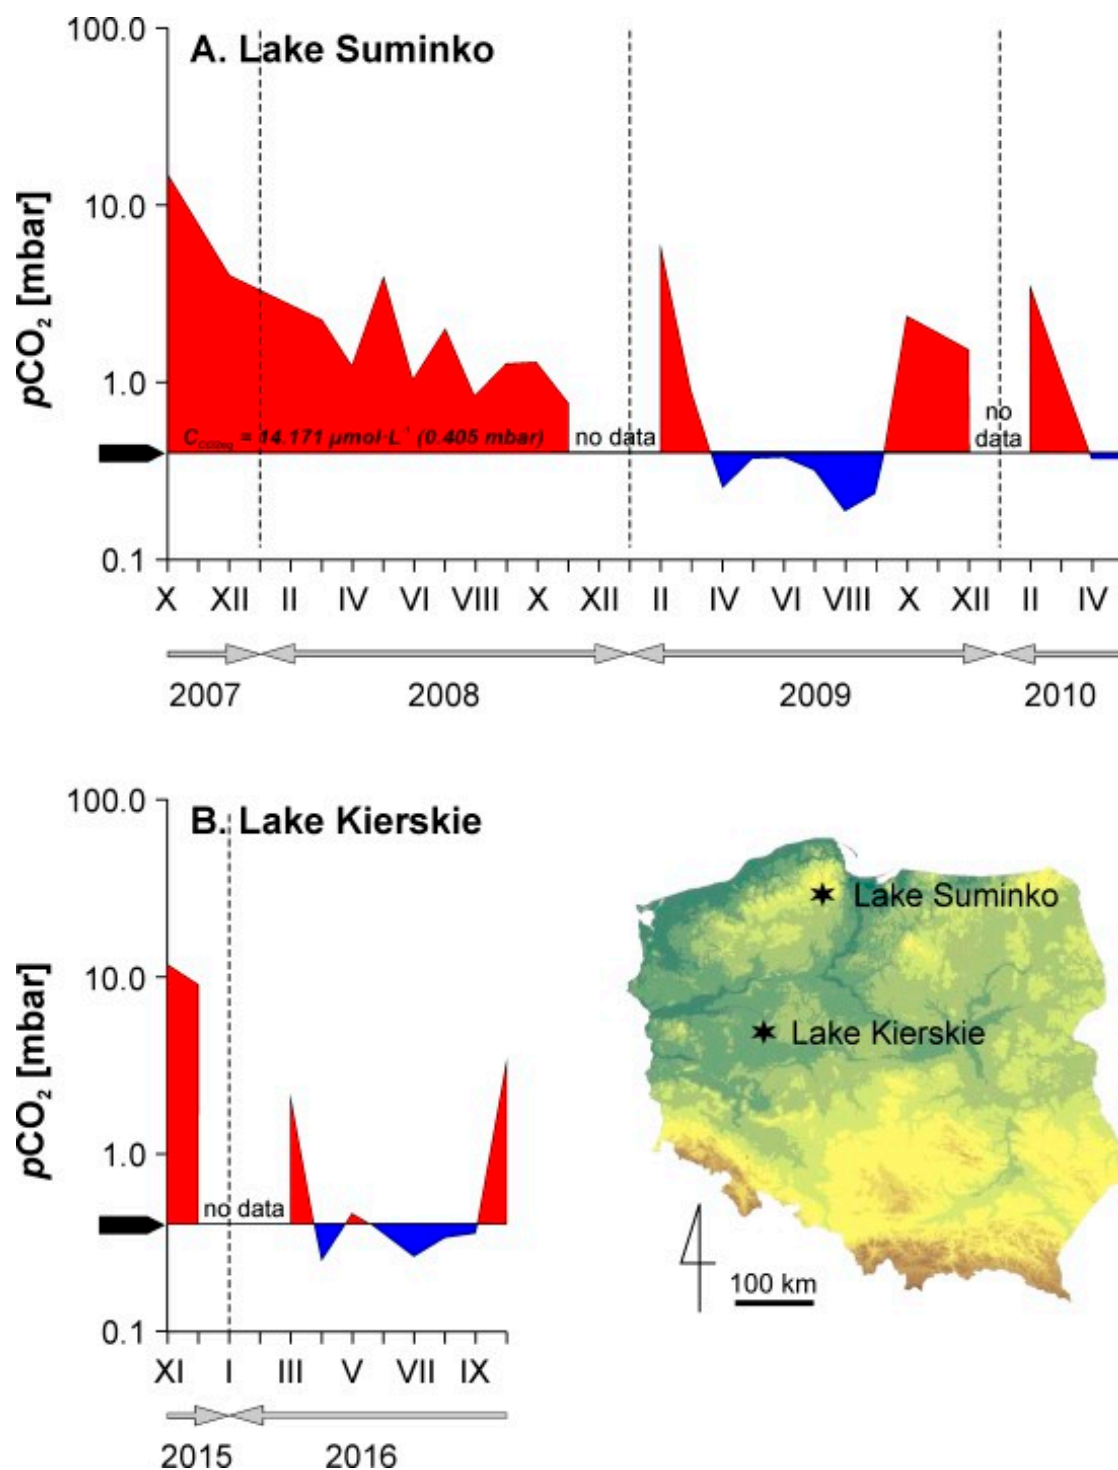

**Figure S9.** Temporal changes in  $p\text{CO}_2$  in the surface waters of Lake Suminko (A) and Lake Kierskie (B).

Arrow indicate equilibrium  $\text{CO}_2$  concentration in Polish lakes. Heterotrophic periods marked in red, while autotrophic in blue.



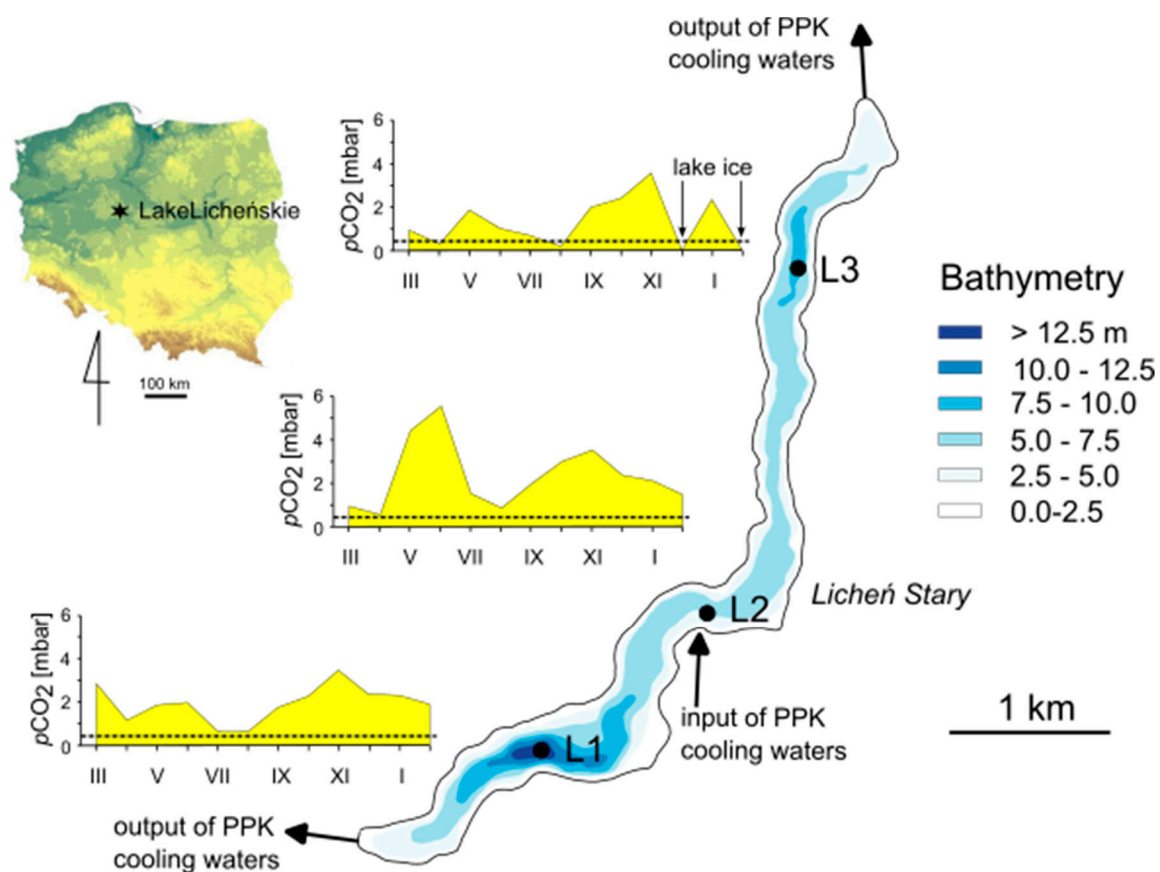

**Figure S10.** Spatial and temporal changes in  $p\text{CO}_2$  in the surface water of Lake Licheńskie. the equilibrium  $\text{CO}_2$  concentrations in Polish lakes marked with a dotted line.

The data enabled identifying  $\text{CO}_2$  emission hotspot. Bathymetric map according to Inland Fisheries Institute, Olsztyn, PL.

**Table S1.** Location of data collection sites, sampling strategy and data availability

| No. | Lake                  | Country <sup>#</sup> | Coordinates            | Lake type <sup>&amp;</sup> | EC [ $\mu\text{S}\cdot\text{cm}^{-1}$ ] | Data collection period and frequency                                                                                              | Source & availability                                                                                                        |
|-----|-----------------------|----------------------|------------------------|----------------------------|-----------------------------------------|-----------------------------------------------------------------------------------------------------------------------------------|------------------------------------------------------------------------------------------------------------------------------|
| 1   | Licheńskie            | PL                   | 52°18'30"N, 18°20'19"E | GL                         | 566 – 687                               | Data collected at the deepest point every 1 m from the surface to the bottom, between 12.2014 and 09.2015 with monthly resolution | Unpublished; available on request at Biogeochemistry Research Group, AMU Poznań, PL                                          |
| 2   | Dębno                 | PL                   | 52°17'31"N, 16°42'09"E | GL                         | 818 – 1140                              | Data collected at the deepest point every 1 m from the surface to the bottom between 07.2019 and 07.2020 with monthly resolution  | Unpublished; available on request at Biogeochemistry Research Group, AMU Poznań, PL                                          |
| 2   | Łódzko-Dymaczewskie   | PL                   | 52°15'22"N, 16°44'31"E | GL                         | 570 – 815                               |                                                                                                                                   |                                                                                                                              |
| 4   | Trześniowskie (Ciecz) | PL                   | 52°20'50"N, 15°17'26"E | GL                         | 358 – 473                               |                                                                                                                                   |                                                                                                                              |
| 5   | Ostrowite             | PL                   | 53°48'27"N, 17°36'16"E | GL                         | 224 – 226                               |                                                                                                                                   |                                                                                                                              |
| 6   | Jeleń                 | PL                   | 53°49'37"N, 17°35'37"E | GL                         | 231                                     | Data collected on 07-08.08.2017 at the deepest points on the lakes 1 m below the lake surface                                     | [57]                                                                                                                         |
| 7   | Płesno                | PL                   | 53°48'52"N, 17°32'57"E | GL                         | 253                                     |                                                                                                                                   |                                                                                                                              |
| 8   | Krzywce Wielkie       | PL                   | 53°50'18"N, 17°33'37"E | GL                         | 42.3                                    |                                                                                                                                   |                                                                                                                              |
| 9   | Zielone               | PL                   | 53°49'18"N, 17°35'49"E | GL                         | 238                                     |                                                                                                                                   |                                                                                                                              |
| 10  | Skrzynka              | PL                   | 53°48'52"N, 17°31'30"E | GL                         | 241                                     |                                                                                                                                   |                                                                                                                              |
| 11  | Krzywce Małe          | PL                   | 53°49'32"N, 17°32'43"E | GL                         | 44.2                                    |                                                                                                                                   |                                                                                                                              |
| 12  | Mielnica              | PL                   | 53°48'25"N, 17°31'05"E | GL                         | 269                                     |                                                                                                                                   |                                                                                                                              |
| 13  | Główka                | PL                   | 53°48'36"N, 17°34'16"E | GL                         | 234                                     |                                                                                                                                   |                                                                                                                              |
| 14  | Bełczak               | PL                   | 53°48'53"N, 17°34'23"E | GL                         | 226                                     |                                                                                                                                   |                                                                                                                              |
| 15  | Resko Przym.          | PL                   | 54°08'32"N, 15°22'37"E | CL                         | 4927 – 7087                             | Data collected from surface and near-bottom layer between 02.2015 and 10.2015 with quarterly resolution                           | Unpublished; available on request at Biogeochemistry Research Group, AMU Poznań, PL                                          |
| 16  | Jamno                 | PL                   | 54°16'24"N, 16°09'02"E | CL                         | 407 – 521                               |                                                                                                                                   |                                                                                                                              |
| 17  | Bukowo                | PL                   | 54°20'35"N, 16°16'43"E | CL                         | 1394 – 2770                             |                                                                                                                                   |                                                                                                                              |
| 18  | Kopań                 | PL                   | 54°29'04"N, 16°27'02"E | CL                         | 2602 – 2966                             |                                                                                                                                   |                                                                                                                              |
| 19  | Wicko                 | PL                   | 54°32'22"N, 16°37'08"E | CL                         | 376 – 625                               |                                                                                                                                   |                                                                                                                              |
| 20  | Gardno                | PL                   | 54°39'14"N, 17°06'43"E | CL                         | 1455 – 3057                             |                                                                                                                                   |                                                                                                                              |
| 21  | Łebsko                | PL                   | 54°42'22"N, 17°23'01"E | CL                         | 3618 – 8242                             |                                                                                                                                   |                                                                                                                              |
| 22  | Sarbsko               | PL                   | 54°45'58"N, 17°38'10"E | CL                         | 374 – 1327                              | Data collected from surface and near-bottom layer between 12.2007 and 08.2008 with quarterly resolution                           | [65 - 66]                                                                                                                    |
| 23  | Stechlin              | DE                   | 53°09'00"N, 13°01'30"E | GL                         | 251 – 284                               | Data collected at the deepest point from the surface to the bottom between 01.2020 and 12.2021 with monthly resolution            | Data available on request at the IGB data repository ( <a href="https://fred.igb-berlin.de">https://fred.igb-berlin.de</a> ) |

|    |               |    |                        |    |           |                                                                                                                        |                                                                           |
|----|---------------|----|------------------------|----|-----------|------------------------------------------------------------------------------------------------------------------------|---------------------------------------------------------------------------|
| 24 | Rotsee        | CH | 47°04'11"N, 8°18'51"E  | GL | 182 – 580 | Data collected at the deepest point from the surface to the bottom between 02.2007 and 01.2008 with monthly resolution | [67]                                                                      |
| 25 | Edasjön       | SV | 59°48'06"N, 17°53'57"E | GL | 73 – 201  | Data collected at the lake surface                                                                                     | Data available at                                                         |
| 26 | Siggeforasjön | SV | 59°58'36"N, 17°08'41"E | GL | 41 – 55   | monthly between 1983 and 2022                                                                                          | <a href="https://miljodata.slu.se/MVM;">https://miljodata.slu.se/MVM;</a> |
| 27 | Fiolen        | SV | 57°05'03"N, 14°31'51"E | GL | 65 – 66   |                                                                                                                        | [58]                                                                      |
| 28 | Tångerdasjön  | SV | 57°27'43"N, 15°03'54"E | GL | 65 – 158  |                                                                                                                        |                                                                           |

<sup>†</sup>Country: PL – Poland, DE – Germany, CH – Switzerland, SV – Sweden

<sup>&</sup>Lake type: CL – coastal lake, GL – glacial lake

**Table S2.** Activity coefficient  $\gamma$  for  $\text{HCO}_3^-$  for different  $EC$  and  $t$ 

| $t$           | $EC [\mu\text{S}\cdot\text{cm}^{-1}]$ |       |       |       |       |       |
|---------------|---------------------------------------|-------|-------|-------|-------|-------|
| $[\text{°C}]$ | 50                                    | 100   | 500   | 1000  | 5000  | 8000  |
| 0             | 0.972                                 | 0.960 | 0.916 | 0.893 | 0.816 | 0.786 |
| 10            | 0.972                                 | 0.959 | 0.915 | 0.892 | 0.813 | 0.783 |
| 20            | 0.971                                 | 0.958 | 0.913 | 0.890 | 0.811 | 0.780 |
| 30            | 0.971                                 | 0.958 | 0.912 | 0.889 | 0.808 | 0.778 |

**Table S3.** Activity coefficient  $\gamma$  for  $\text{CO}_3^{2-}$  for different  $EC$  and  $t$ 

| $t$           | $EC [\mu\text{S}\cdot\text{cm}^{-1}]$ |       |       |       |       |      |
|---------------|---------------------------------------|-------|-------|-------|-------|------|
| $[\text{°C}]$ | 50                                    | 100   | 500   | 1000  | 5000  | 8000 |
| 0             | 0.893                                 | 0.851 | 0.707 | 0.642 | 0.454 | 0.39 |
| 10            | 0.891                                 | 0.848 | 0.703 | 0.637 | 0.448 | 0.39 |
| 20            | 0.890                                 | 0.846 | 0.699 | 0.633 | 0.443 | 0.38 |
| 30            | 0.888                                 | 0.844 | 0.695 | 0.628 | 0.438 | 0.38 |

**Table S4.** Activity coefficient  $\gamma$  for  $\text{Ca}^{2+}$  for different  $EC$  and  $t$ 

| $t$           | $EC [\mu\text{S}\cdot\text{cm}^{-1}]$ |       |       |       |       |       |
|---------------|---------------------------------------|-------|-------|-------|-------|-------|
| $[\text{°C}]$ | 50                                    | 100   | 500   | 1000  | 5000  | 8000  |
| 0             | 0.894                                 | 0.853 | 0.716 | 0.655 | 0.483 | 0.429 |
| 10            | 0.893                                 | 0.851 | 0.712 | 0.650 | 0.477 | 0.424 |
| 20            | 0.891                                 | 0.848 | 0.709 | 0.646 | 0.472 | 0.419 |
| 30            | 0.889                                 | 0.846 | 0.705 | 0.642 | 0.467 | 0.414 |

**Table S5.** Activity coefficient  $\gamma$  for  $\text{Mg}^{2+}$  for different  $EC$  and  $t$ 

| $t$           | $EC [\mu\text{S}\cdot\text{cm}^{-1}]$ |       |       |       |       |       |
|---------------|---------------------------------------|-------|-------|-------|-------|-------|
| $[\text{°C}]$ | 50                                    | 100   | 500   | 1000  | 5000  | 8000  |
| 0             | 0.896                                 | 0.856 | 0.727 | 0.671 | 0.517 | 0.471 |
| 10            | 0.894                                 | 0.854 | 0.723 | 0.667 | 0.512 | 0.466 |
| 20            | 0.893                                 | 0.852 | 0.720 | 0.663 | 0.507 | 0.461 |
| 30            | 0.891                                 | 0.850 | 0.716 | 0.659 | 0.503 | 0.456 |
